# Supplementary material for: UrQt: an efficient software for the Unsupervised Quality trimming of NGS data
Source: PubMed Central journal article supplement (PMC4450468; doi:10.1186/s12859-015-0546-8), 2015-04-29
Supplement: 12859_2015_546_MOESM1_ESM.pdf [file 12859_2015_546_MOESM1_ESM.pdf]

# Quality analysis of the seven NGS samples

December 19, 2014

Quality analysis of the seven NGS samples (Table 1) with the FastQC software [1].

Table 1: **NGS data sets used for testing**

| Accession number | Species                         | sample type | paired-end | read size (bp) | reference genome |
|------------------|---------------------------------|-------------|------------|----------------|------------------|
| SRR002073        | <i>Homo sapiens</i>             | RNA         | no         | 33             | hg19             |
| SRR521463        | <i>Homo sapiens</i>             | RNA         | yes        | 75             | hg19             |
| SRR420813        | <i>Arabidopsis thaliana</i>     | RNA         | no         | 83             | TAIR10           |
| SRX150254        | <i>Prunus persica</i>           | DNA         | yes        | 100            | 1.22             |
| SRR452441        | <i>Saccharomyces cerevisiae</i> | DNA         | yes        | 100            | EF4              |
| SRR988074        | <i>Drosophila melanogaster</i>  | DNA         | yes        | 101            | 5.41             |
| SRR919326        | <i>Drosophila melanogaster</i>  | RNA         | yes        | 101            | 5.41             |

## Contents

|          |                                                               |          |
|----------|---------------------------------------------------------------|----------|
| <b>1</b> | <b><i>Homo sapiens</i> RNA sample (SRR002073)</b>             | <b>3</b> |
| 1.1      | Per base sequence quality . . . . .                           | 3        |
| 1.2      | Per sequence quality scores . . . . .                         | 3        |
| 1.3      | Per base sequence content . . . . .                           | 3        |
| <b>2</b> | <b><i>Homo sapiens</i> RNA sample (SRR521463)</b>             | <b>4</b> |
| 2.1      | Per base sequence quality . . . . .                           | 4        |
| 2.2      | Per sequence quality scores . . . . .                         | 4        |
| 2.3      | Per base sequence content . . . . .                           | 4        |
| <b>3</b> | <b><i>Arabidopsis thaliana</i> RNA sample (SRR420813)</b>     | <b>5</b> |
| 3.1      | Per base sequence quality . . . . .                           | 5        |
| 3.2      | Per sequence quality scores . . . . .                         | 5        |
| 3.3      | Per base sequence content . . . . .                           | 5        |
| <b>4</b> | <b><i>Prunus persica</i> DNA sample (SRX150254)</b>           | <b>6</b> |
| 4.1      | Per base sequence quality . . . . .                           | 6        |
| 4.2      | Per sequence quality scores . . . . .                         | 6        |
| 4.3      | Per base sequence content . . . . .                           | 6        |
| <b>5</b> | <b><i>Saccharomyces cerevisiae</i> DNA sample (SRR452441)</b> | <b>7</b> |
| 5.1      | Per base sequence quality . . . . .                           | 7        |
| 5.2      | Per sequence quality scores . . . . .                         | 7        |
| 5.3      | Per base sequence content . . . . .                           | 7        |
| <b>6</b> | <b><i>Drosophila melanogaster</i> RNA sample (SRR919326)</b>  | <b>8</b> |
| 6.1      | Per base sequence quality . . . . .                           | 8        |
| 6.2      | Per sequence quality scores . . . . .                         | 8        |
| 6.3      | Per base sequence content . . . . .                           | 8        |
| <b>7</b> | <b><i>Drosophila melanogaster</i> DNA sample (SRR988074)</b>  | <b>9</b> |
| 7.1      | Per base sequence quality . . . . .                           | 9        |
| 7.2      | Per sequence quality scores . . . . .                         | 9        |
| 7.3      | Per base sequence content . . . . .                           | 9        |

# 1 *Homo sapiens* RNA sample (SRR002073)

## 1.1 Per base sequence quality

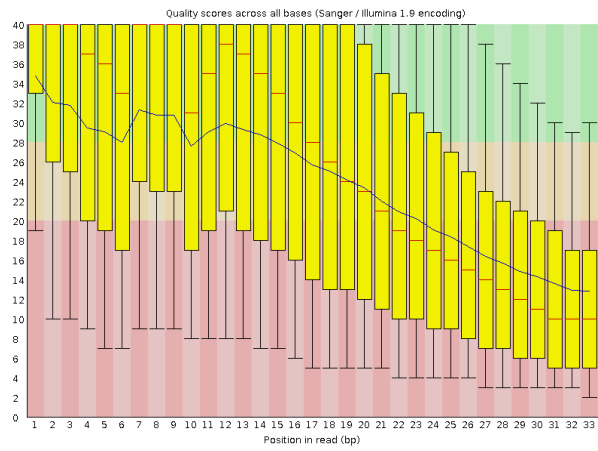

## 1.2 Per sequence quality scores

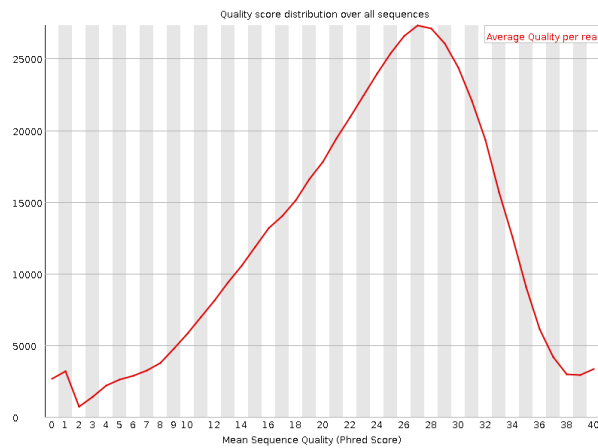

## 1.3 Per base sequence content

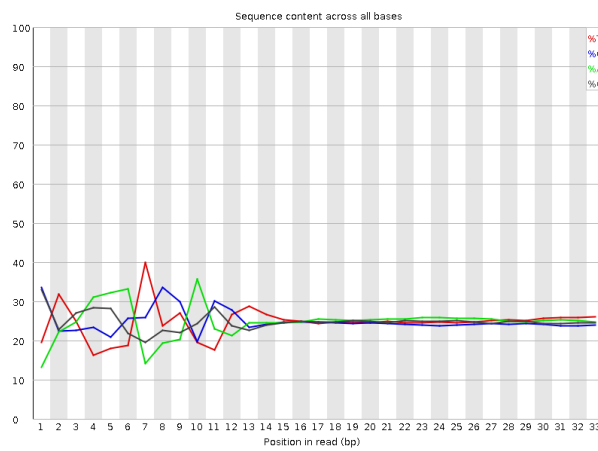

W

## 2 *Homo sapiens* RNA sample (SRR521463)

### 2.1 Per base sequence quality

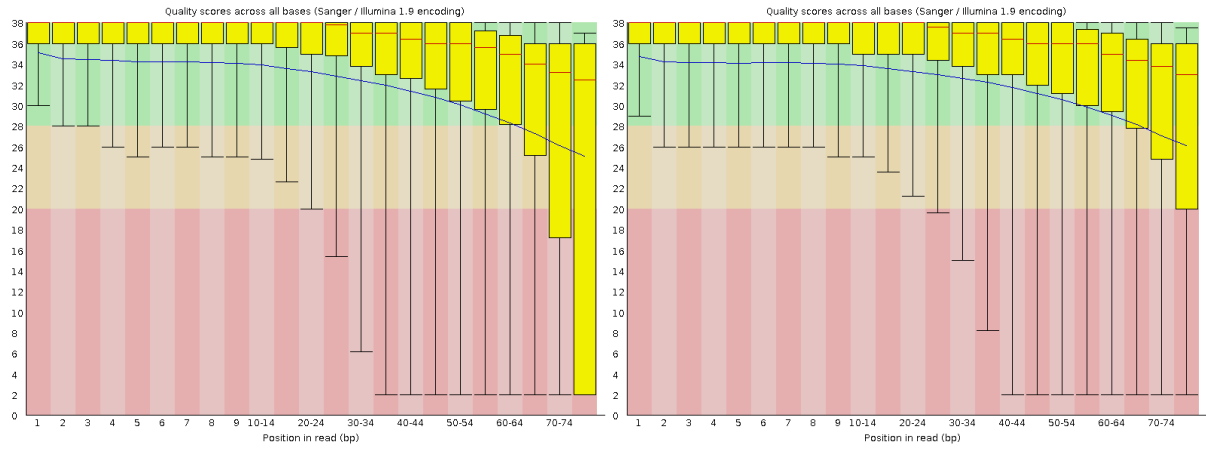

### 2.2 Per sequence quality scores

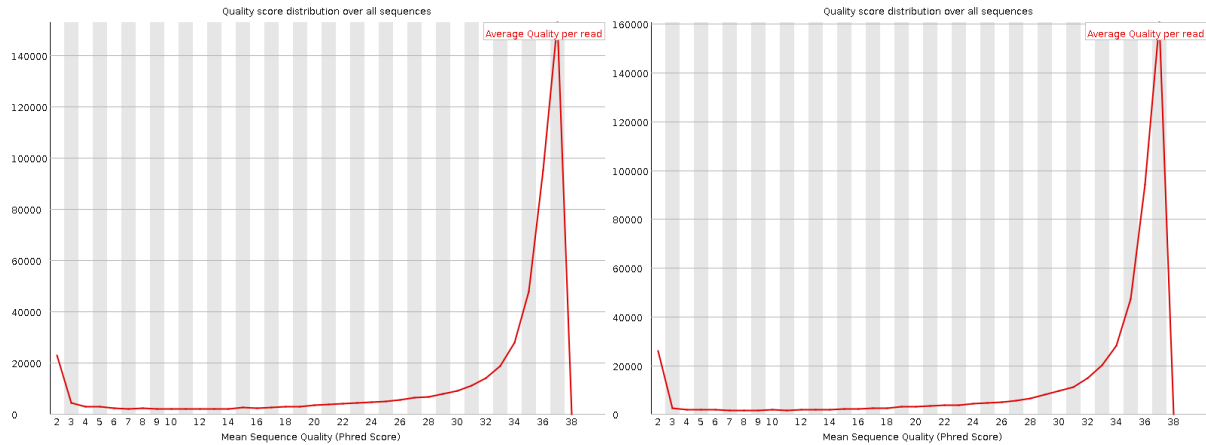

### 2.3 Per base sequence content

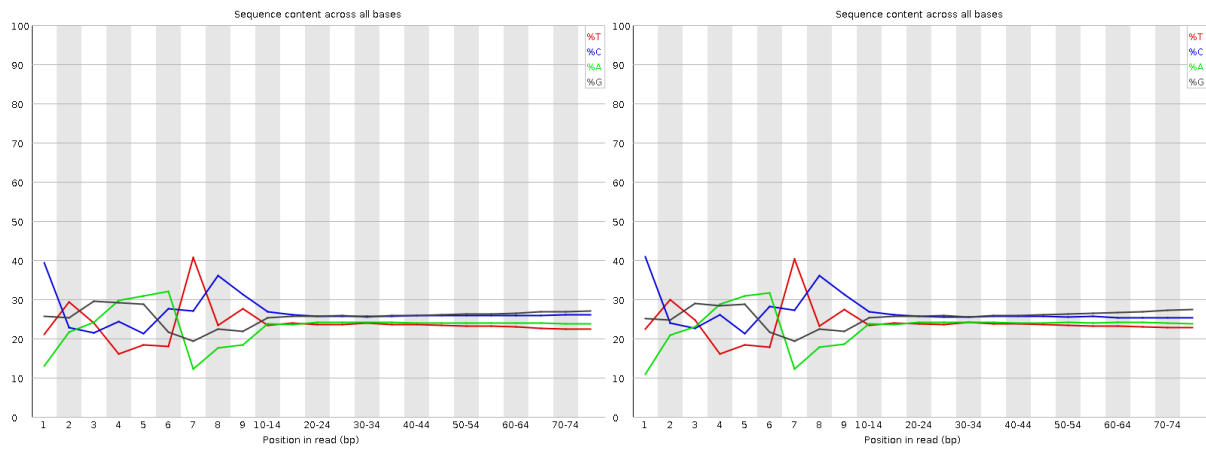

### 3 *Arabidopsis thaliana* RNA sample (SRR420813)

#### 3.1 Per base sequence quality

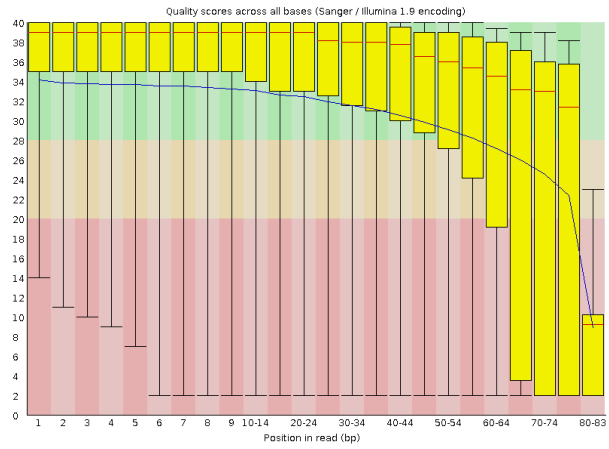

#### 3.2 Per sequence quality scores

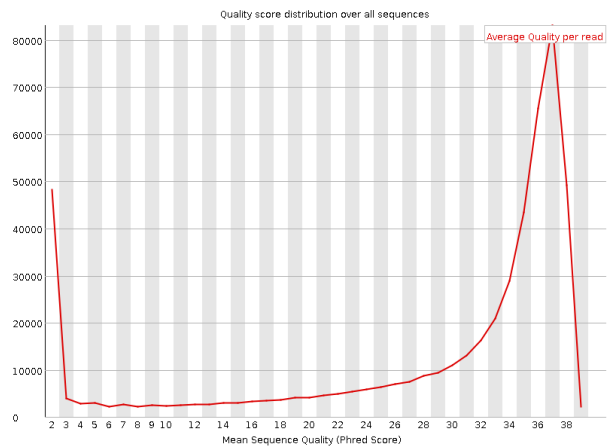

#### 3.3 Per base sequence content

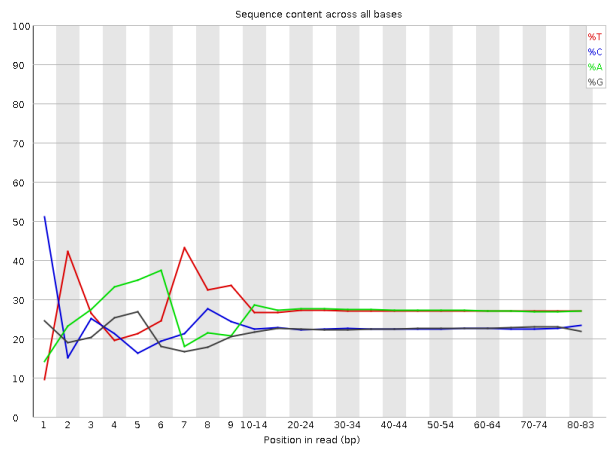

## 4 *Prunus persica* DNA sample (SRX150254)

### 4.1 Per base sequence quality

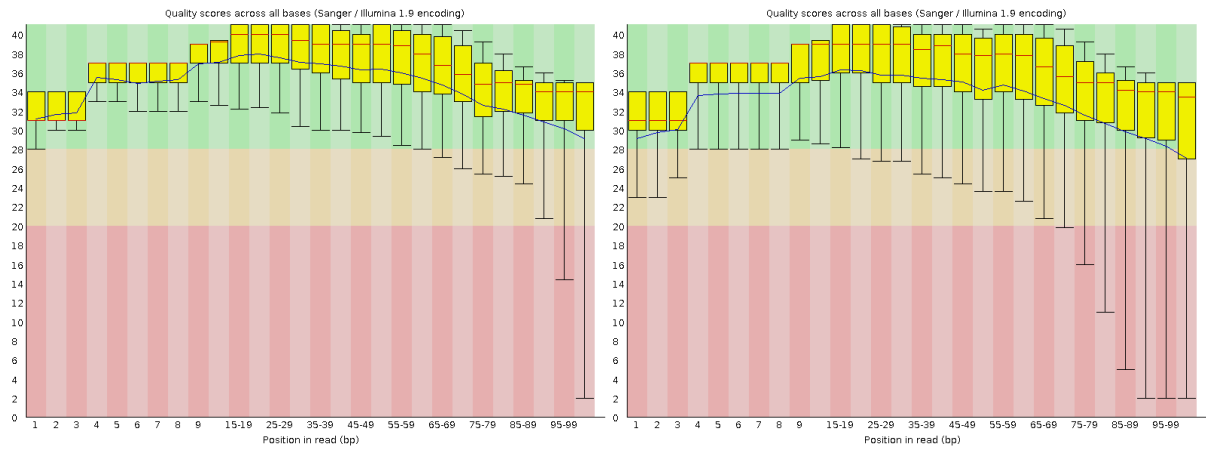

### 4.2 Per sequence quality scores

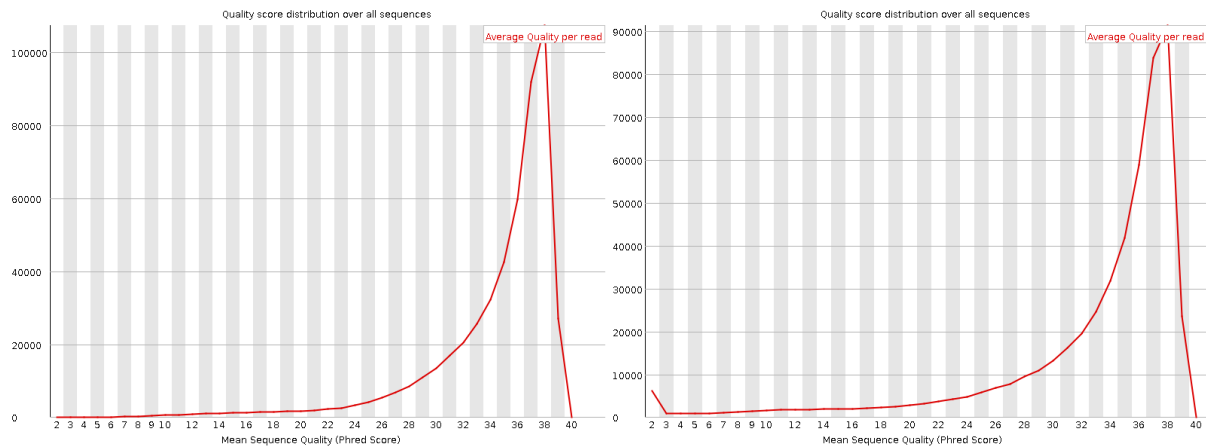

### 4.3 Per base sequence content

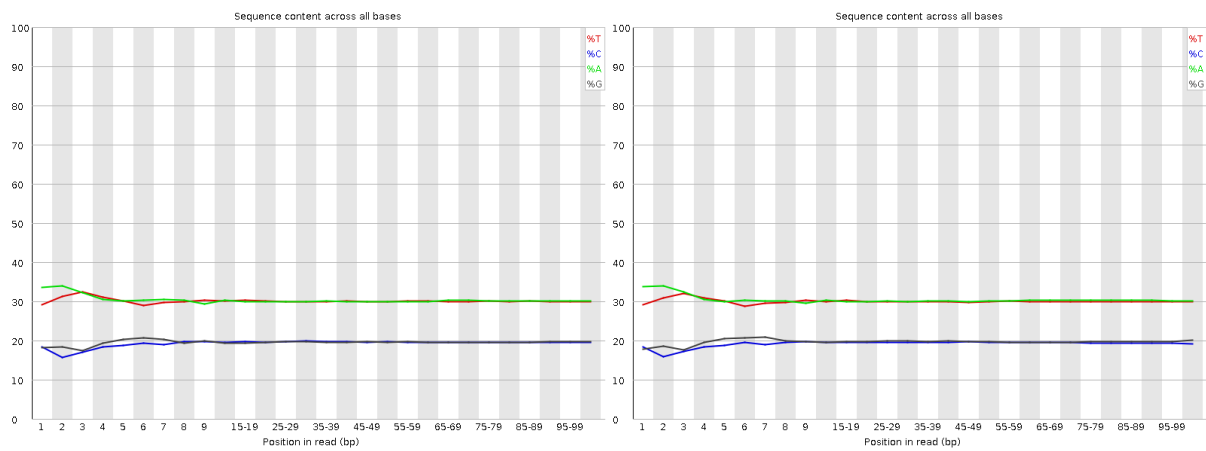

## 5 *Saccharomyces cerevisiae* DNA sample (SRR452441)

### 5.1 Per base sequence quality

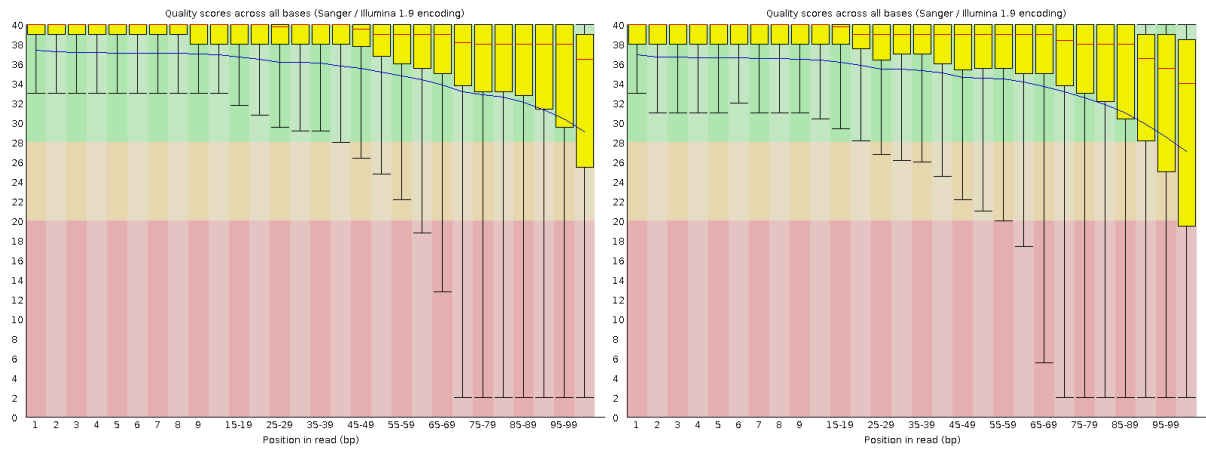

### 5.2 Per sequence quality scores

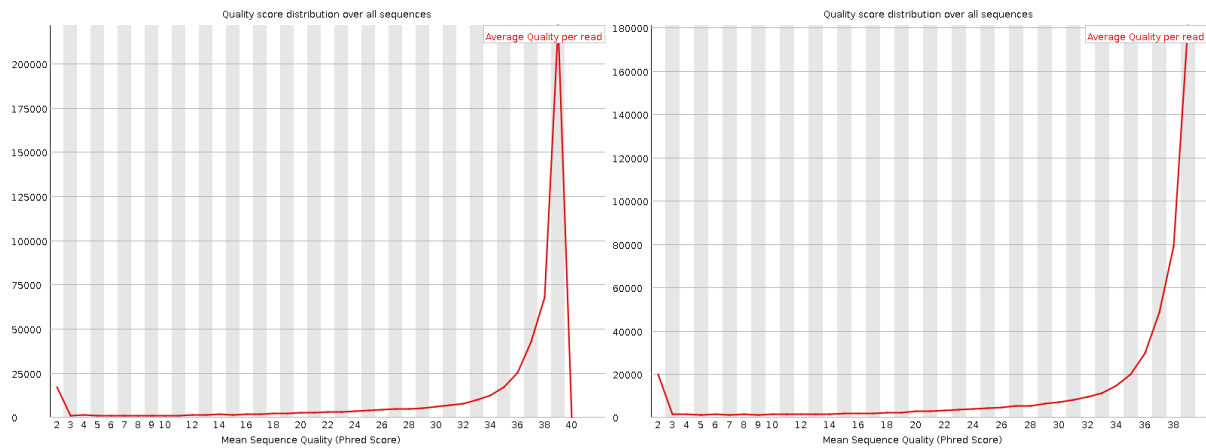

### 5.3 Per base sequence content

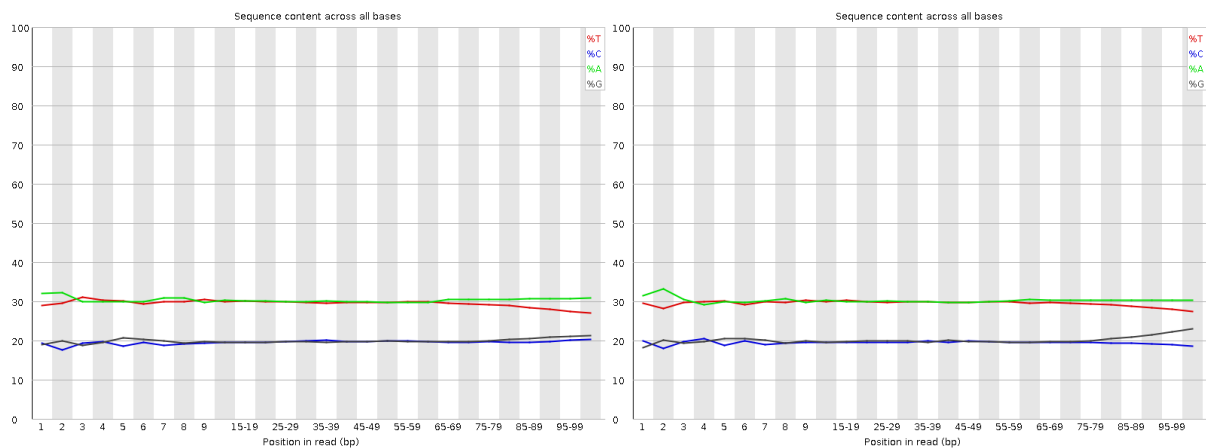

## 6 *Drosophila melanogaster* RNA sample (SRR919326)

### 6.1 Per base sequence quality

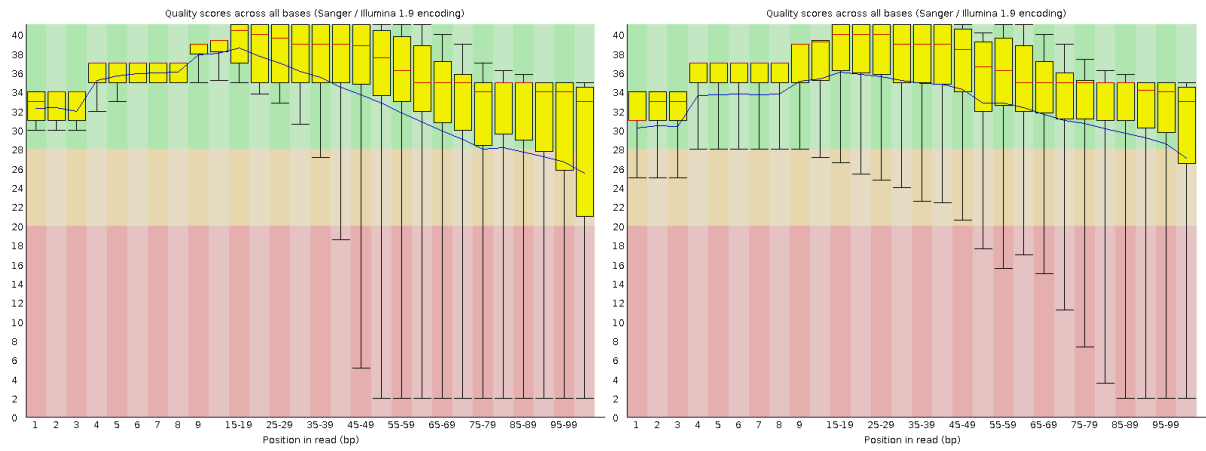

### 6.2 Per sequence quality scores

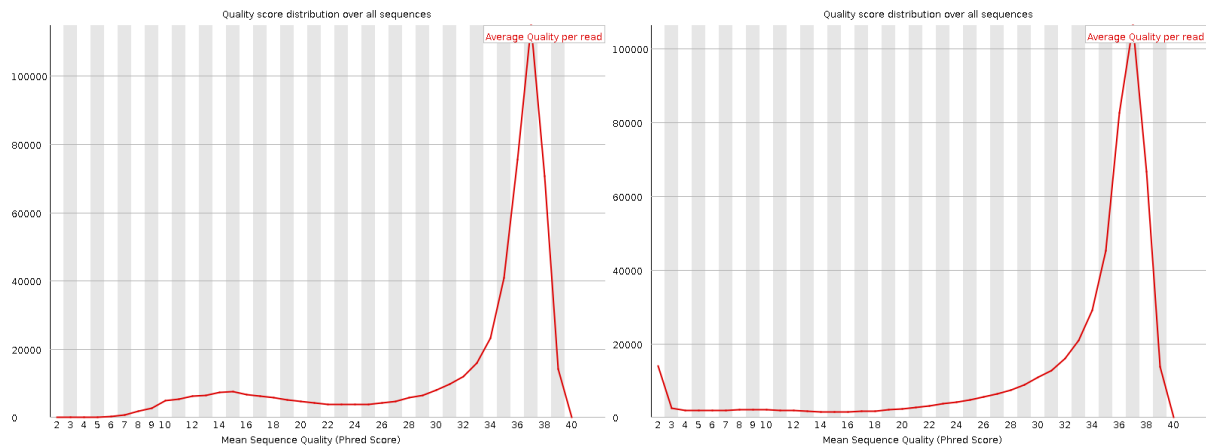

### 6.3 Per base sequence content

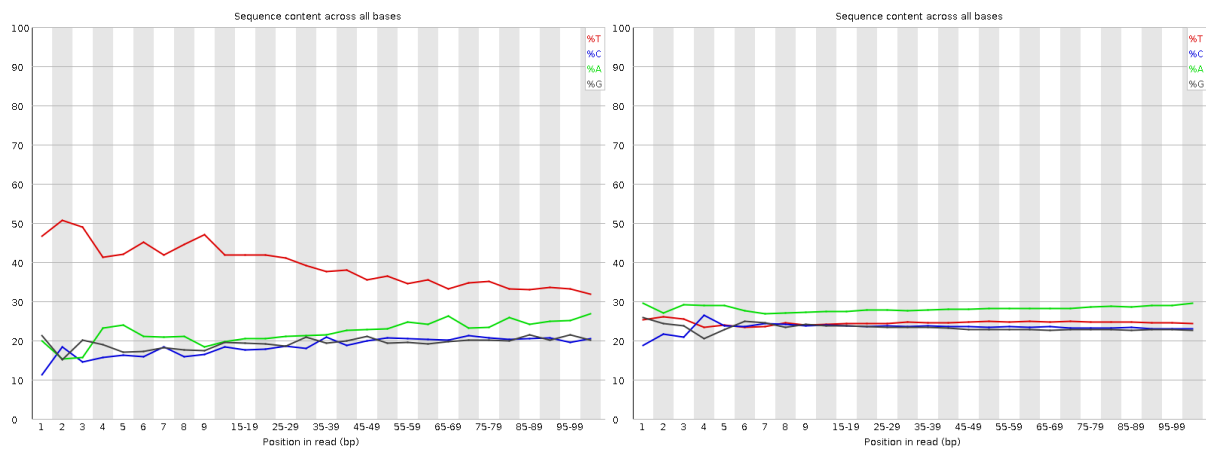



## 7 *Drosophila melanogaster* DNA sample (SRR988074)

### 7.1 Per base sequence quality

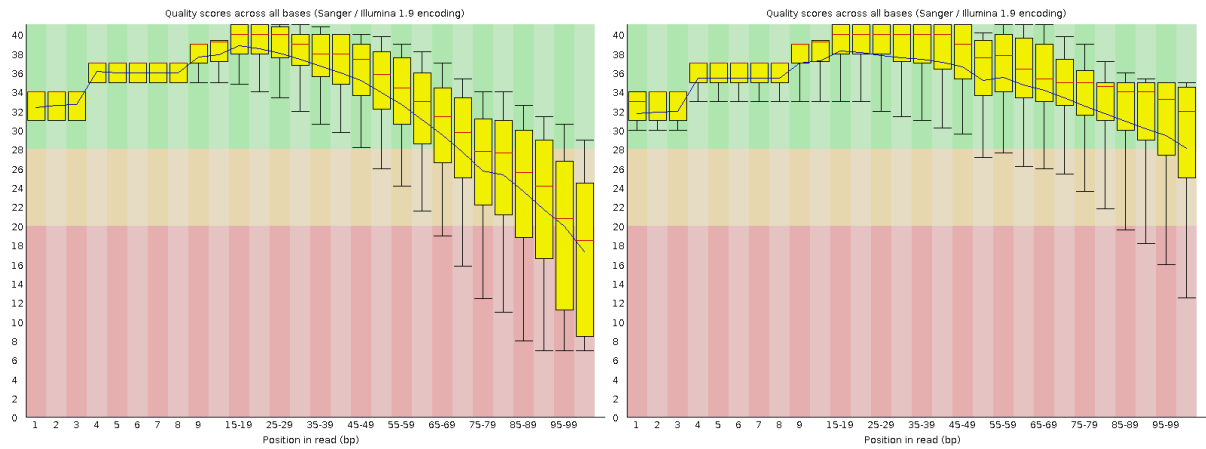

### 7.2 Per sequence quality scores

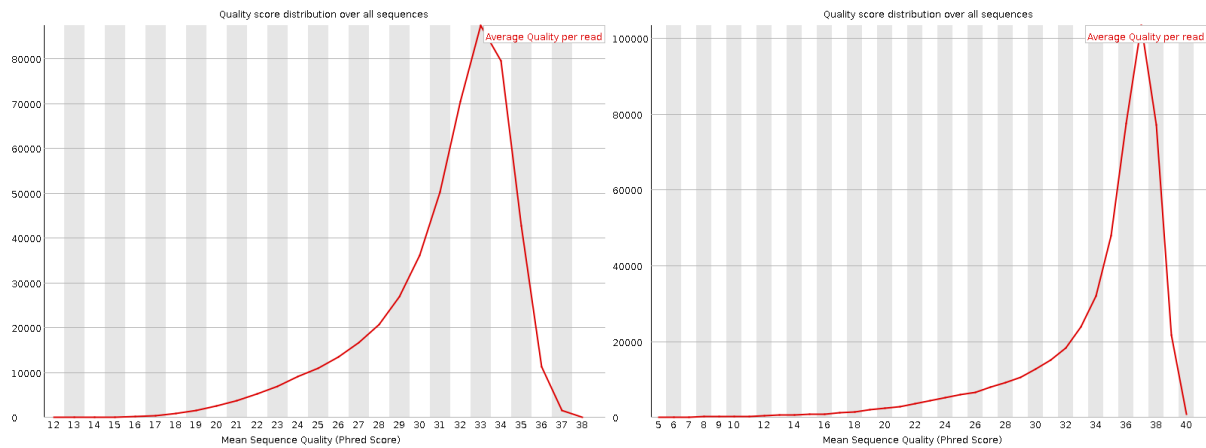

### 7.3 Per base sequence content

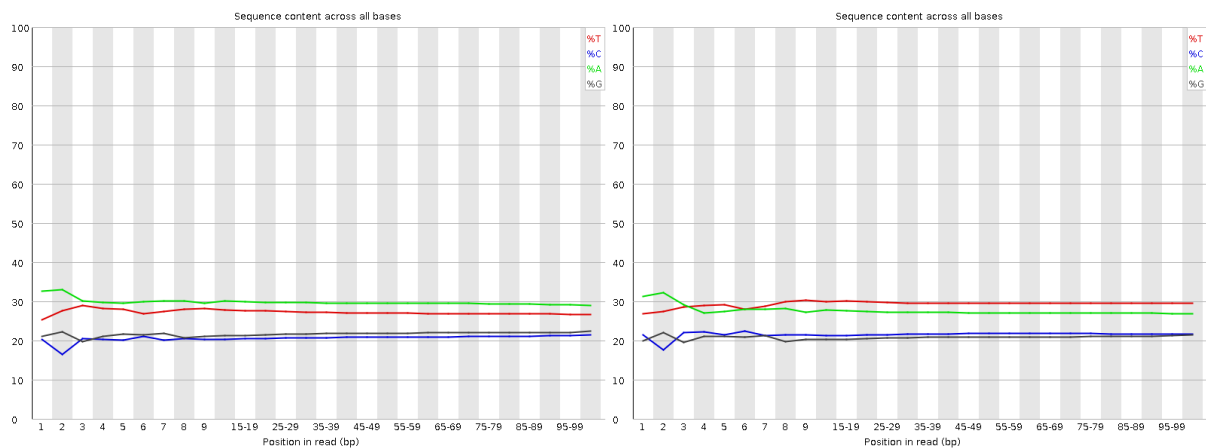

## References

- [1] Andrews, S.: Fastqc a quality control tool for high throughput sequence data.  
<http://www.bioinformatics.babraham.ac.uk/projects/fastqc/> (2012)
