# Supplementary material for: UrQt: an efficient software for the Unsupervised Quality trimming of NGS data
Source: PubMed Central journal article supplement (PMC4450468; doi:10.1186/s12859-015-0546-8), 2015-04-29
Supplement: 12859_2015_546_MOESM3_ESM.pdf [file 12859_2015_546_MOESM3_ESM.pdf]

# Quality analysis of the seven NGS samples after trimming

December 22, 2014

Mapping performances for different quality thresholds with the four tested programs and the seven NGS sample (Table 1). Mapping results with Bowtie2 [1] and BWA [2]. The two programs were used with default parameters plus the `-very-sensitive` option for Bowtie2. Paired-end samples were mapped independently.

Table 1: NGS data sets used for testing

| Accession number | Species                         | sample type | paired-end | read size (bp) | reference genome |
|------------------|---------------------------------|-------------|------------|----------------|------------------|
| SRR002073        | <i>Homo sapiens</i>             | RNA         | no         | 33             | hg19             |
| SRR521463        | <i>Homo sapiens</i>             | RNA         | yes        | 75             | hg19             |
| SRR420813        | <i>Arabidopsis thaliana</i>     | RNA         | no         | 83             | TAIR10           |
| SRX150254        | <i>Prunus persica</i>           | DNA         | yes        | 100            | 1.22             |
| SRR452441        | <i>Saccharomyces cerevisiae</i> | DNA         | yes        | 100            | EF4              |
| SRR988074        | <i>Drosophila melanogaster</i>  | DNA         | yes        | 101            | 5.41             |
| SRR919326        | <i>Drosophila melanogaster</i>  | RNA         | yes        | 101            | 5.41             |

The mapping were performed using the prebuild Bowtie2 and BWA indexes from the igenome project available at the following url:

- [ftp://igenome:G3nom3s4u@ftp.illumina.com/Homo\\_sapiens/NCBI/build37.2/Homo\\_sapiens\\_NCBI\\_build37.2.tar.gz](ftp://igenome:G3nom3s4u@ftp.illumina.com/Homo_sapiens/NCBI/build37.2/Homo_sapiens_NCBI_build37.2.tar.gz)
- [ftp://igenome:G3nom3s4u@ftp.illumina.com/Arabidopsis\\_thaliana/NCBI/TAIR10/Arabidopsis\\_thaliana\\_NCBI\\_TAIR10.tar.gz](ftp://igenome:G3nom3s4u@ftp.illumina.com/Arabidopsis_thaliana/NCBI/TAIR10/Arabidopsis_thaliana_NCBI_TAIR10.tar.gz)
- [ftp://igenome:G3nom3s4u@ftp.illumina.com/Saccharomyces\\_cerevisiae/NCBI/build3.1/Saccharomyces\\_cerevisiae\\_NCBI\\_build3.1.tar.gz](ftp://igenome:G3nom3s4u@ftp.illumina.com/Saccharomyces_cerevisiae/NCBI/build3.1/Saccharomyces_cerevisiae_NCBI_build3.1.tar.gz)
- [ftp://igenome:G3nom3s4u@ftp.illumina.com/Drosophila\\_melanogaster/NCBI/build5.41/Drosophila\\_melanogaster\\_NCBI\\_build5.41.tar.gz](ftp://igenome:G3nom3s4u@ftp.illumina.com/Drosophila_melanogaster/NCBI/build5.41/Drosophila_melanogaster_NCBI_build5.41.tar.gz)

Counts of reads mapping to unique or multiple positions correspond to count of the flags XS and AS for Bowtie2 and XT:A:U and XT:A:R for BWA.

# Contents

|          |                                               |          |
|----------|-----------------------------------------------|----------|
| <b>1</b> | <b>Bowtie2</b>                                | <b>4</b> |
| 1.1      | Reads mapped . . . . .                        | 4        |
| 1.2      | Reads mapping to an unique position . . . . . | 5        |
| 1.3      | Reads mapping to multiple positions . . . . . | 6        |
| <b>2</b> | <b>BWA</b>                                    | <b>8</b> |
| 2.1      | Reads mapped . . . . .                        | 8        |
| 2.2      | Reads mapping to an unique position . . . . . | 9        |
| 2.3      | Reads mapping to multiple positions . . . . . | 10       |



# 1 Bowtie2

## 1.1 Reads mapped

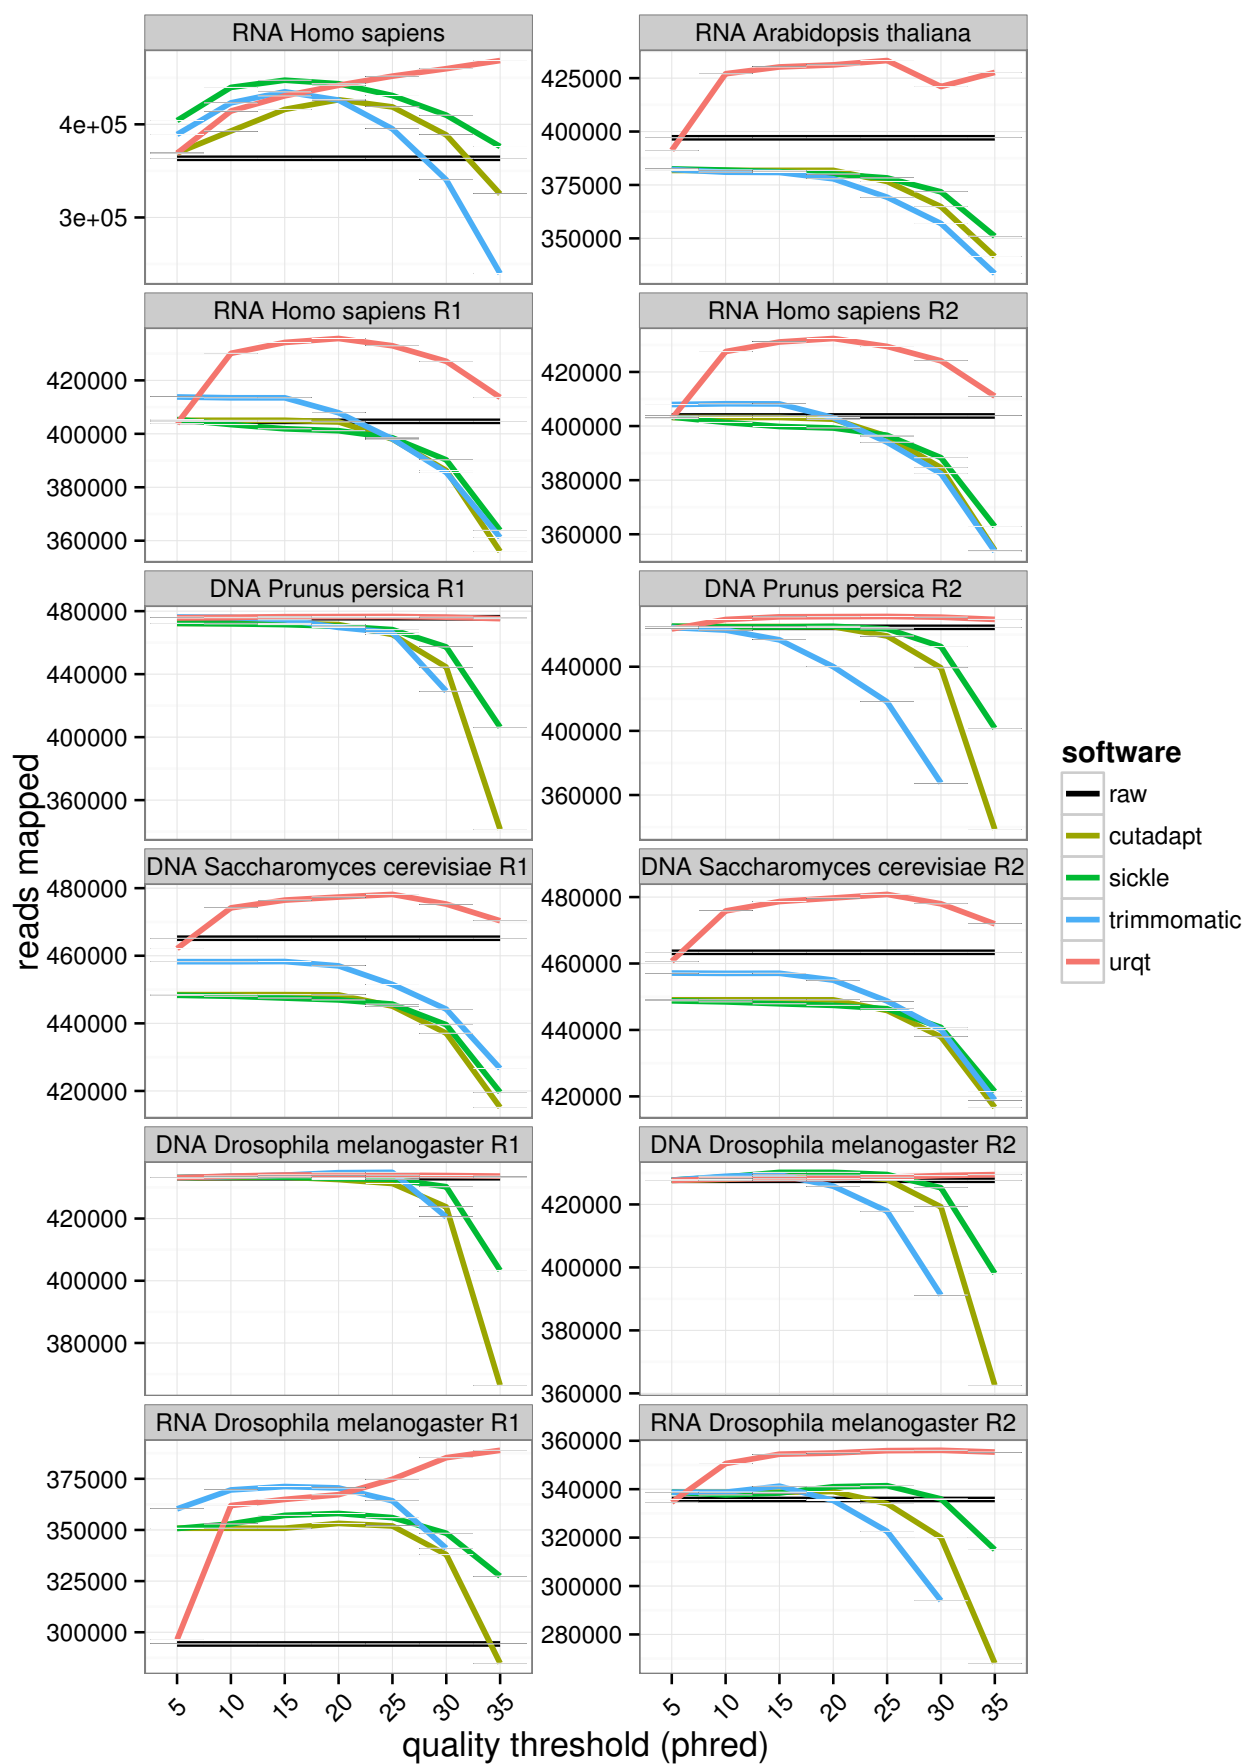

## 1.2 Reads mapping to an unique position

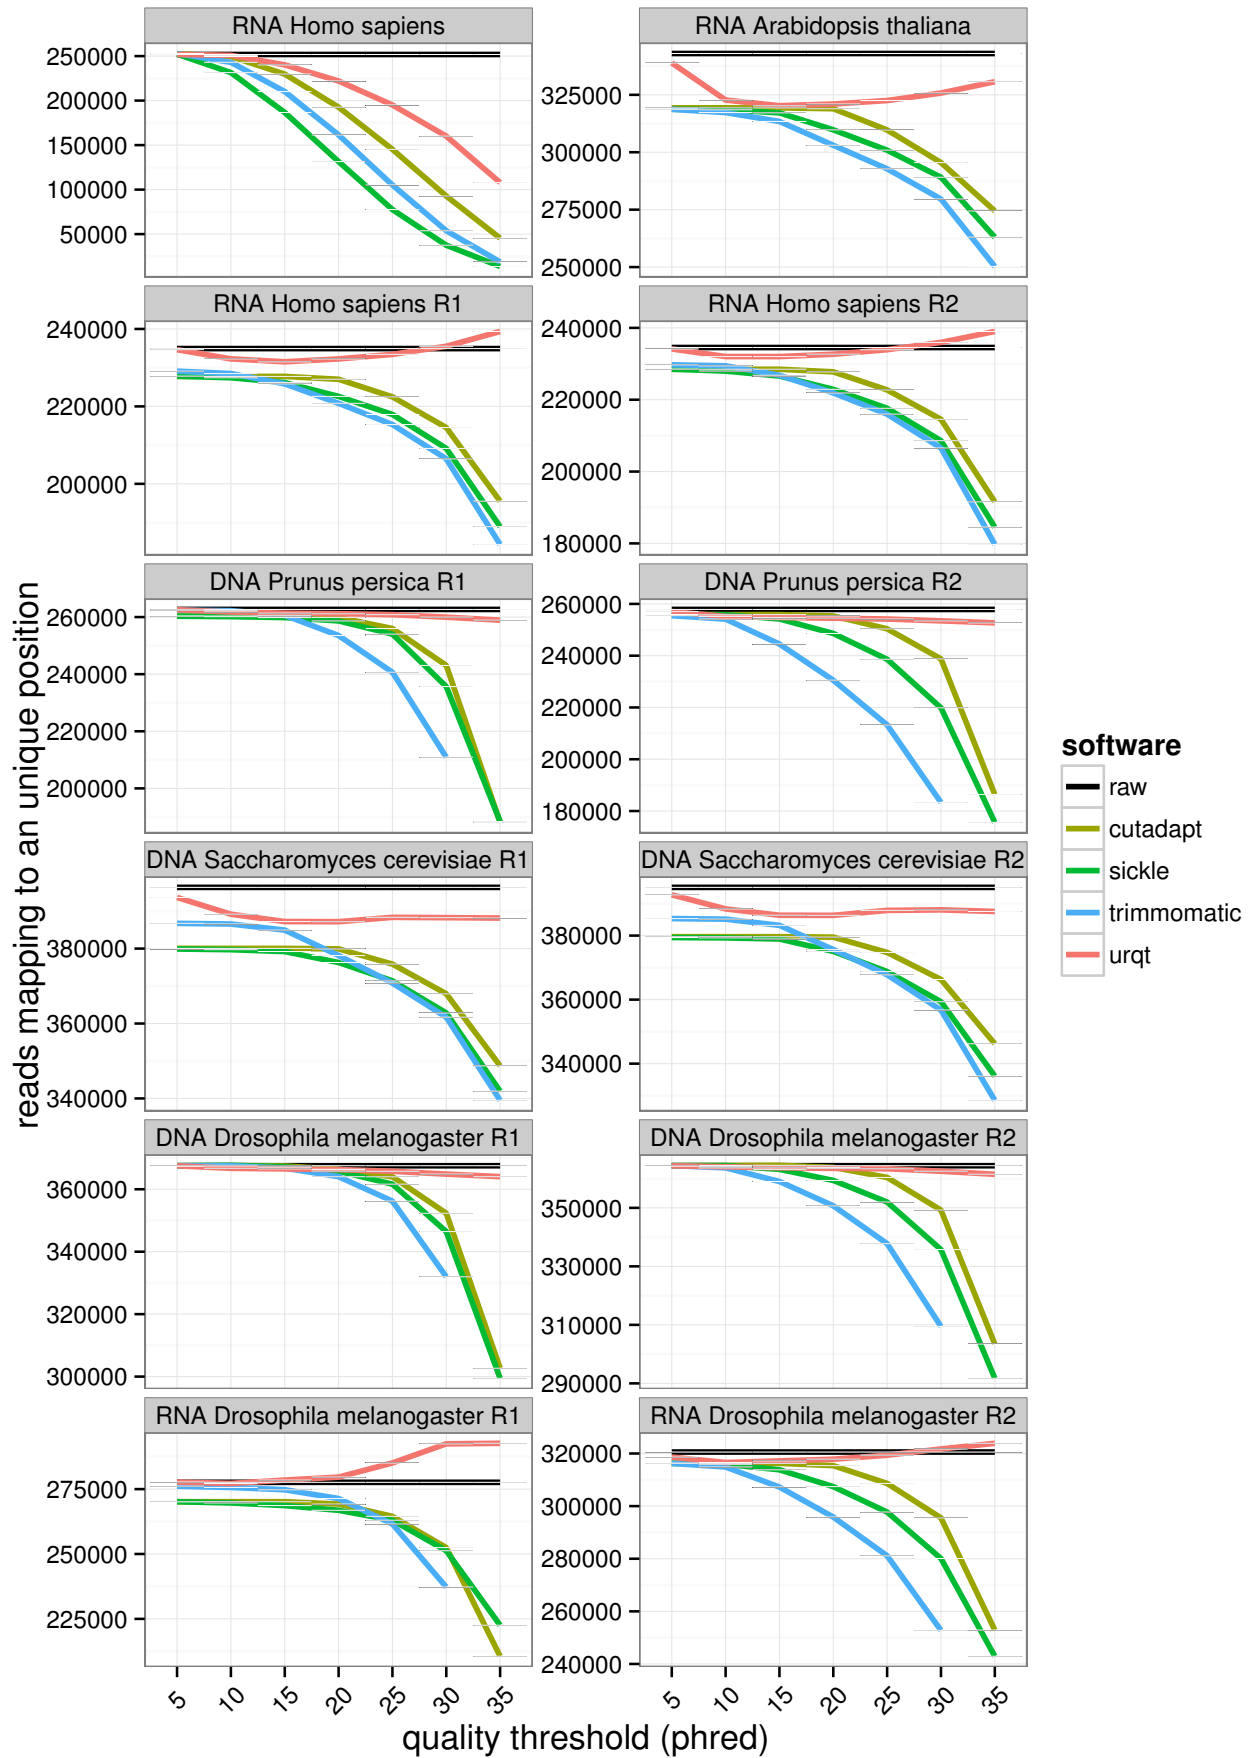

### 1.3 Reads mapping to multiple positions

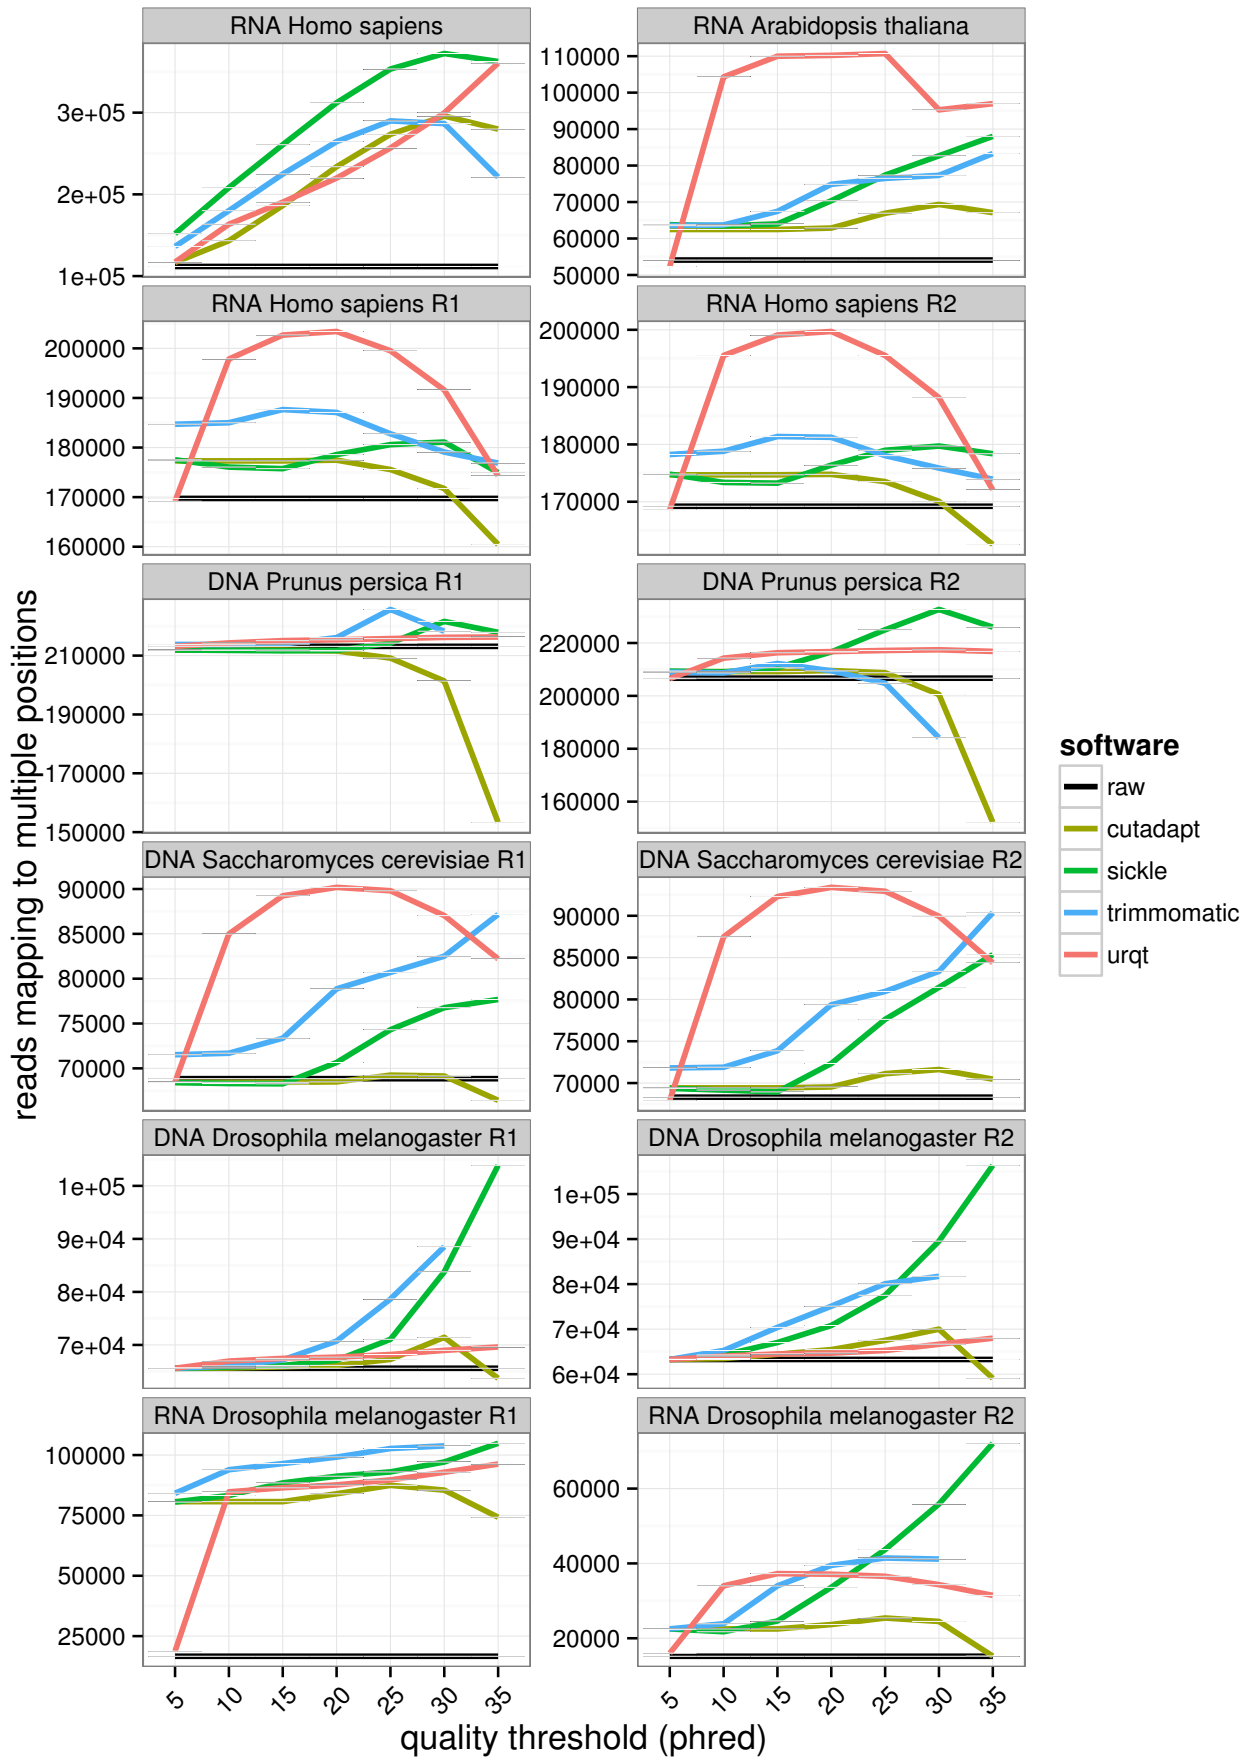



## 2 BWA

### 2.1 Reads mapped

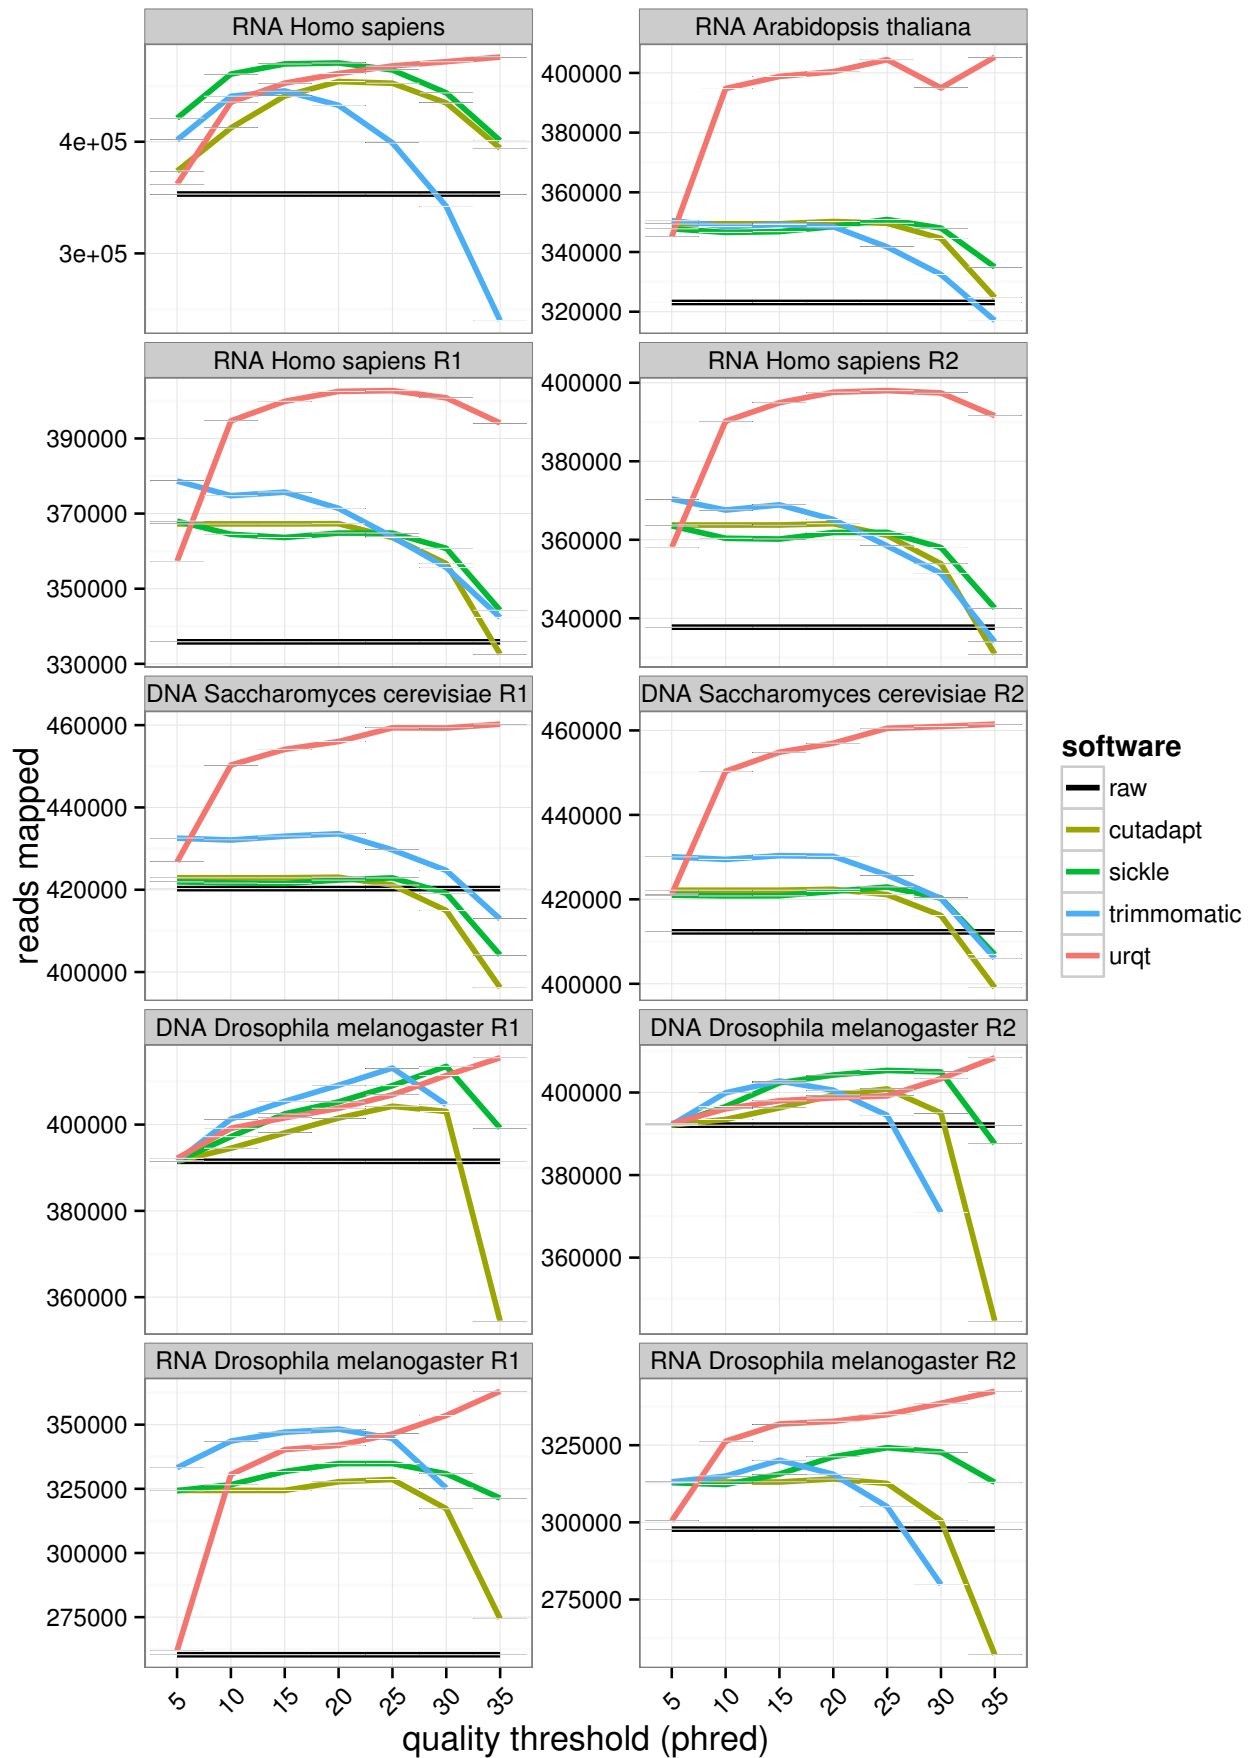



## 2.2 Reads mapping to a unique position

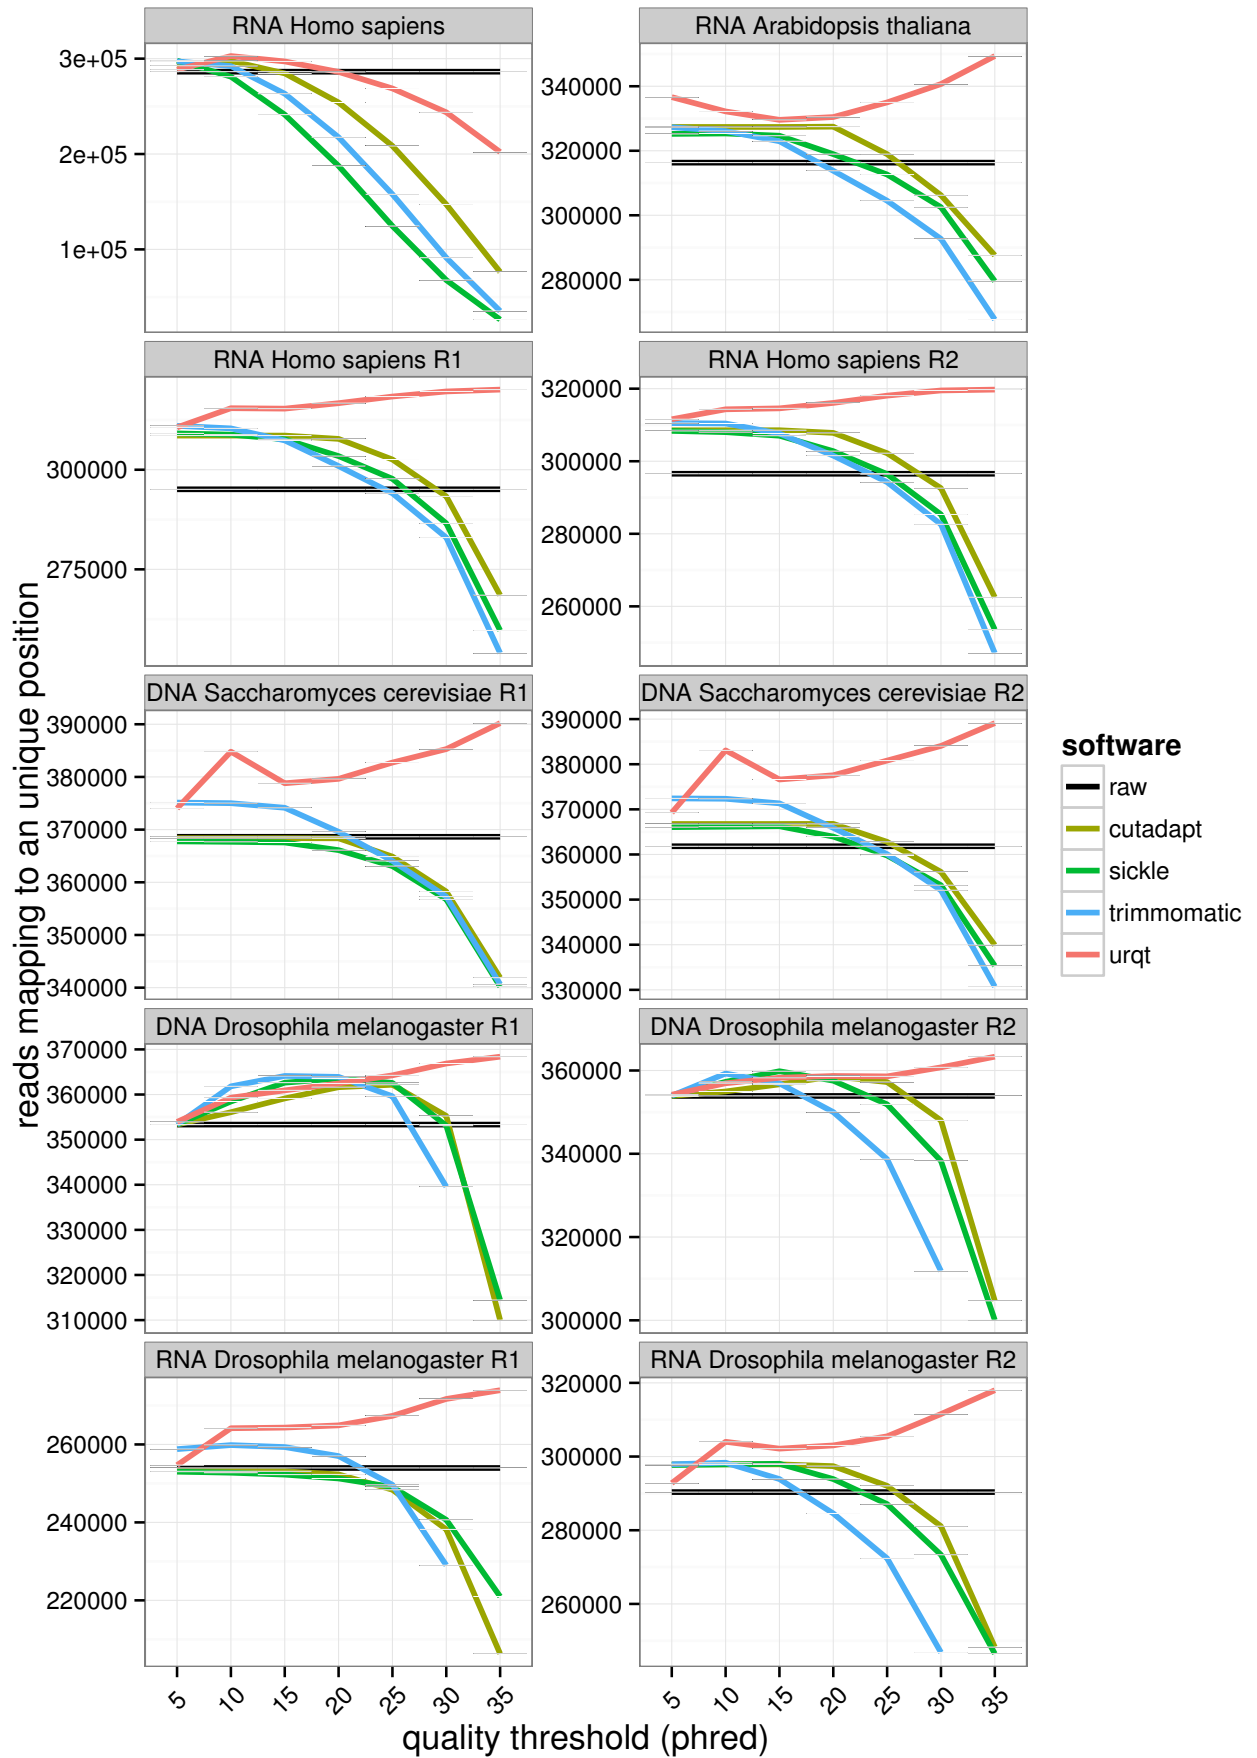

## 2.3 Reads mapping to multiple positions

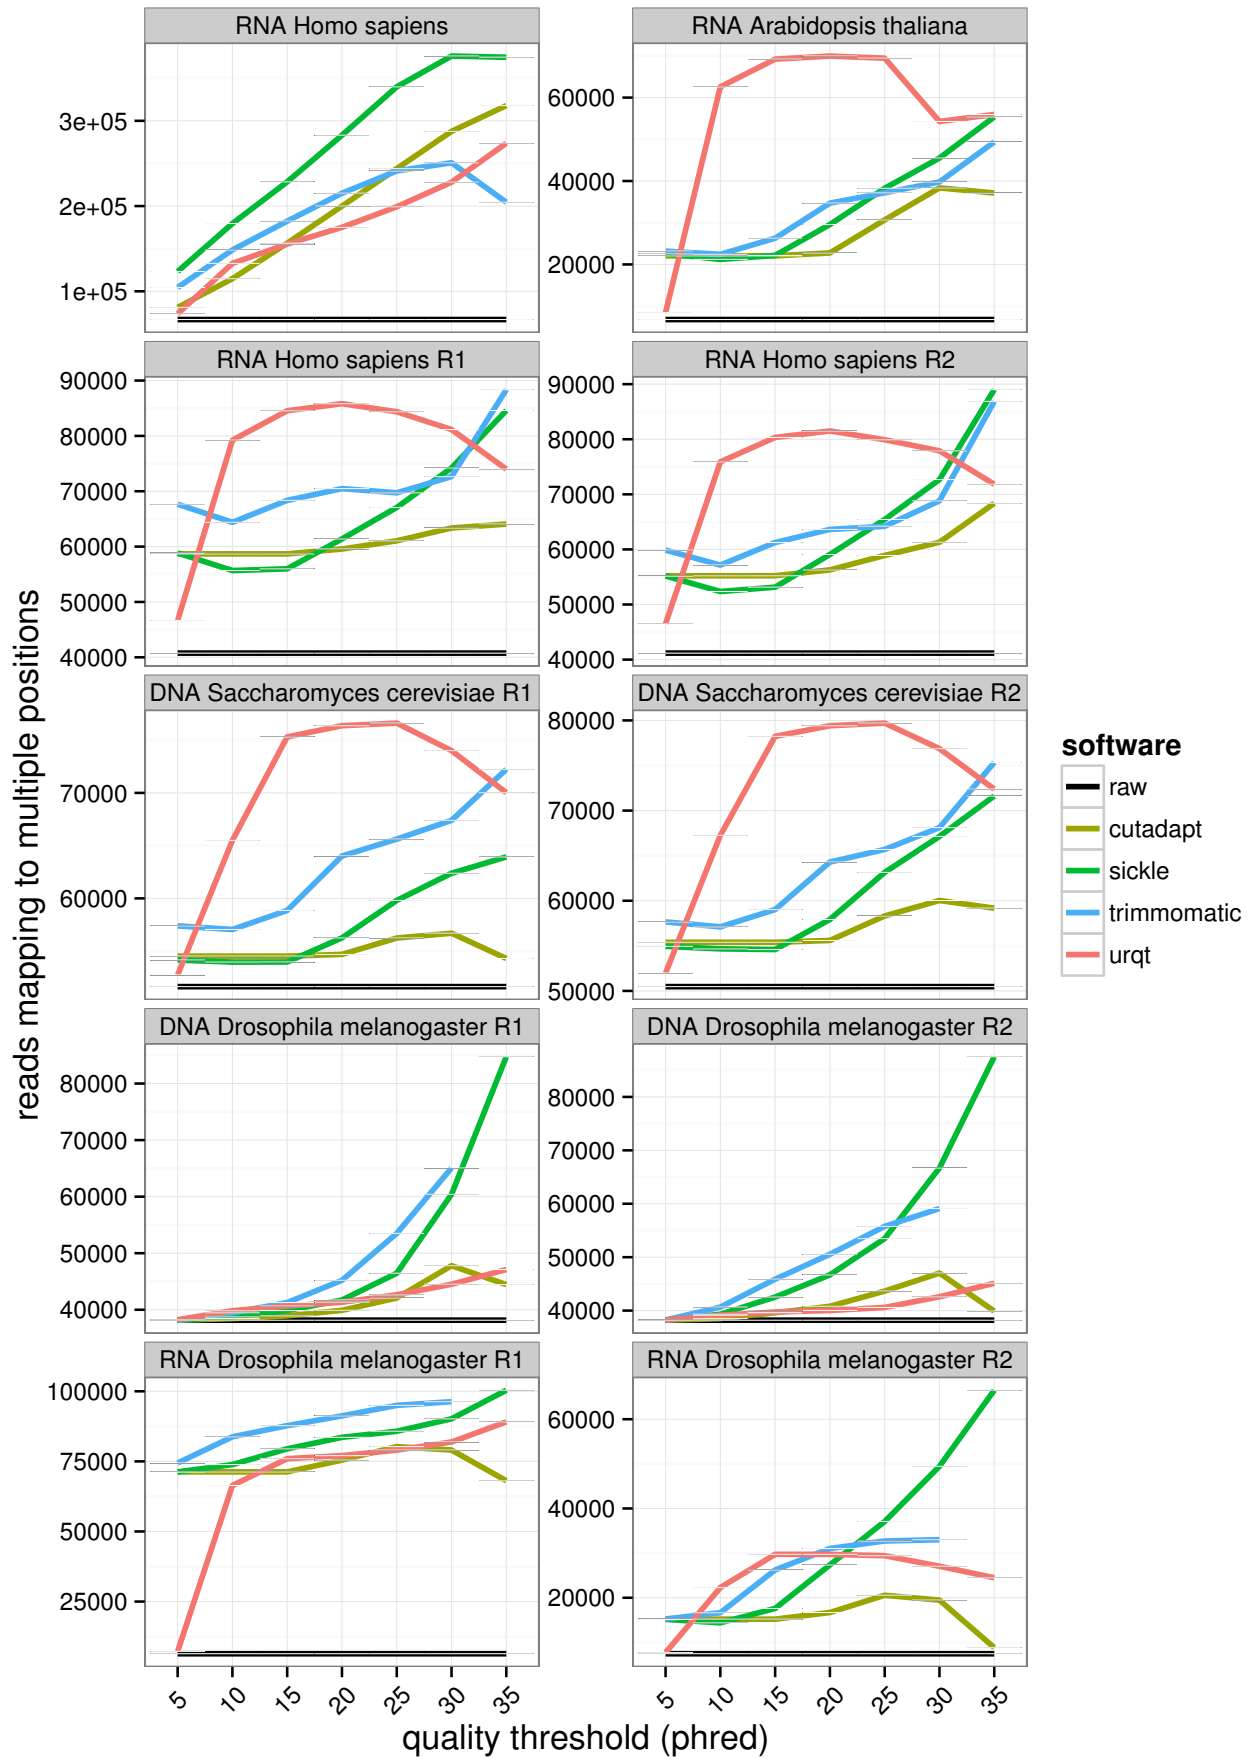

## References

- [1] Langmead, B., Salzberg, S.L.: Fast gapped-read alignment with Bowtie 2. *Nat. Methods* **9**(4), 357–9 (2012)
- [2] Li, H., Durbin, R.: Fast and accurate short read alignment with burrows-wheeler transform. *Bioinformatics* **25**(14), 1754–1760 (2009). doi:10.1093/bioinformatics/btp324
